# Supplementary material for: Topological insulator Bi2Se3 based electrochemical aptasensors for the application of sensitive detection of interferon-γ
Source: Royal Society of Chemistry journal article supplement (doi:10.1039/d2tb01760a), 2022-12-07
Supplement: d2tb01760a1.pdf [file d2tb01760a1.pdf]

## Supporting Information for

# Topological Insulator Bi<sub>2</sub>Se<sub>3</sub> Based Electrochemical Aptasensor for the Application of Sensitive Detection of Interferon- $\gamma$

Yetong Wu,<sup>abc</sup> Peng Zhu,<sup>abc</sup> Yujiu Jiang,<sup>abc</sup> Xu Zhang,<sup>abc</sup> Zhiwei Wang,<sup>abc</sup> Bingteng Xie,<sup>d</sup> Tinglu Song,<sup>e</sup> Fulai Zhang,<sup>d</sup> Aiqin Luo,<sup>d</sup> Shanshan Li,<sup>\*f</sup> Xiaolu Xiong<sup>\*abc</sup> and Junfeng Han<sup>\*abc</sup>

<sup>a</sup>Centre for Quantum Physics, Key Laboratory of Advanced Optoelectronic Quantum Architecture and Measurement (MOE), School of Physics, Beijing Institute of Technology, Beijing 100081, China. E-mail: [xiaolu666@bit.edu.cn](mailto:xiaolu666@bit.edu.cn); [pkuhjf@bit.edu.cn](mailto:pkuhjf@bit.edu.cn)

<sup>b</sup>Yangtze Delta Region Academy of Beijing Institute of Technology, Jiaxing, 314019, China.

<sup>c</sup>Beijing Key Lab of Nanophotonics and Ultrafine Optoelectronic Systems, School of Physics, Beijing Institute of Technology, Beijing 100081, China.

<sup>d</sup>Key Laboratory of Molecular Medicine and Biological Diagnosis and Treatment (Ministry of Industry and Information Technology), School of Life Science, Beijing Institute of Technology, Beijing 100081, China.

<sup>e</sup>Experimental Centre of Advanced Materials School of Materials Science & Engineering, Beijing Institute of Technology, Beijing 100081, China.

<sup>f</sup>Department of Rheumatology, China-Japan Friendship Hospital, 100029, Beijing, China. E-mail: [lishanshanbjmu@163.com](mailto:lishanshanbjmu@163.com)

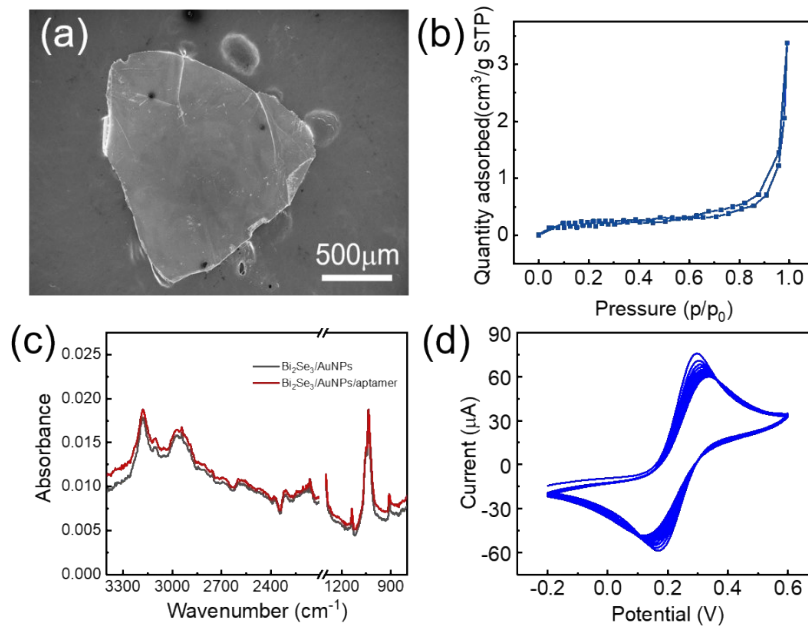

Fig. S1 (a) SEM image of  $\text{Bi}_2\text{Se}_3$  single crystal. (b)  $\text{N}_2$  adsorption-desorption isotherm curve of  $\text{Bi}_2\text{Se}_3$  single crystal. (c) FTIR image of  $\text{Bi}_2\text{Se}_3/\text{AuNPs}$  and  $\text{Bi}_2\text{Se}_3/\text{AuNPs}/\text{aptamer}$ . (d) The electrochemical stability of  $\text{Bi}_2\text{Se}_3/\text{AuNPs}$  electrode by repeated CV.

The surface area and porosity of  $\text{Bi}_2\text{Se}_3$  were measured by BET model in Fig. S1(b). The FTIR was applied to estimate that the aptamer got immobilized on the electrode surface (Fig. S1 (c)). However, due to the small amount of the aptamer on the surface of the  $\text{Bi}_2\text{Se}_3$ , the signal variation is slightly. In order to justify the electrochemical stability of the  $\text{Bi}_2\text{Se}_3/\text{AuNPs}$  electrode, the repeated CV were used for evaluation (Fig. S1 (d)).

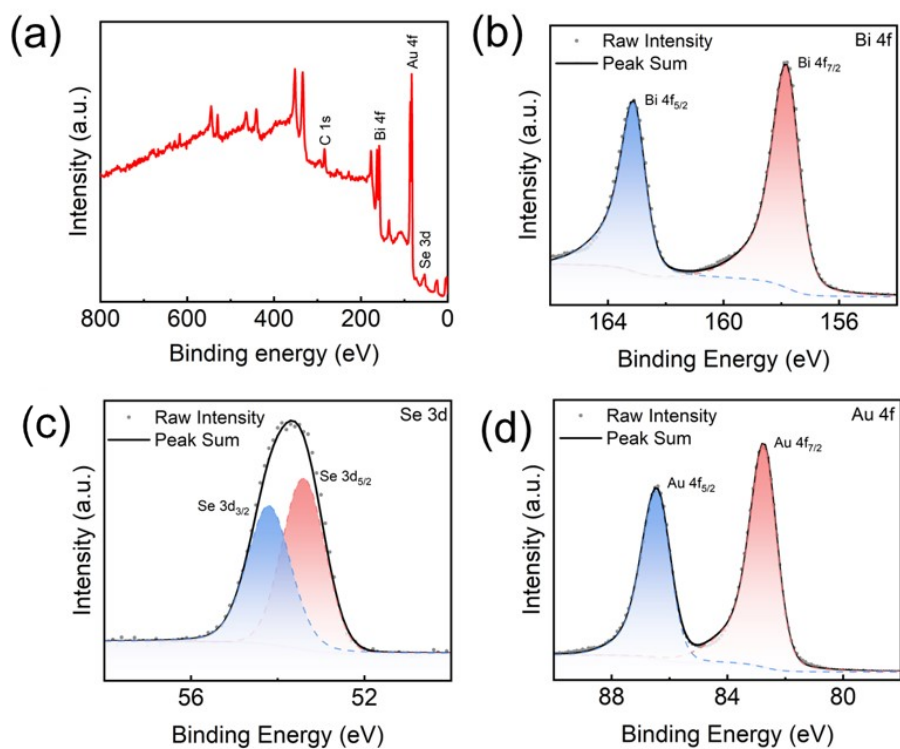

Fig. S2 XPS spectra of  $\text{Bi}_2\text{Se}_3/\text{AuNPs}$  surface. (a) survey scan spectrum and core levels of (b) Bi 4f (c) Se 3d (d) Au 4f.

By XPS analysis, the surface electronic state and composition of  $\text{Bi}_2\text{Se}_3/\text{AuNPs}$  sheets were investigated. Fig. S2 reveals the XPS spectra of  $\text{Bi}_2\text{Se}_3/\text{AuNPs}$  which include the elements of Bi, Se and Au.
